# Supplementary material for: Effects of charge balance and hydrophobicity of the surface of cytochrome c on the distribution behaviour in an ionic liquid/buffer biphasic system
Source: Royal Society of Chemistry journal article supplement (doi:10.1039/c9ob00900k), 2019-01-01
Supplement: c9ob00900k1.pdf [file c9ob00900k1.pdf]

## Supporting Information

### ***Effects of Charge Balance and Hydrophobicity of the Surface of Cytochrome c on the Distribution Behaviour in an Ionic Liquid/Buffer Biphasic System***

Kazuma Ikeda,<sup>a</sup> Kyoko Fujita,<sup>b</sup> Hiroyuki Ohno<sup>a</sup> and Nobuhumi Nakamura<sup>a</sup>

<sup>a</sup> *Department of Biotechnology, Tokyo University of Agriculture and Technology, 2-24-16 Nakacho, Koganei, Tokyo 184-8588, Japan*

<sup>b</sup> *Department of Pathophysiology, Tokyo University of Pharmacy and Life Sciences, 1432-1 Horinouchi, Hachioji, Tokyo, 192-0392, Japan*

\*Corresponding author: E-mail: [kyokof@toyaku.ac.jp](mailto:kyokof@toyaku.ac.jp), Tel and Fax: +81-42-676-5453

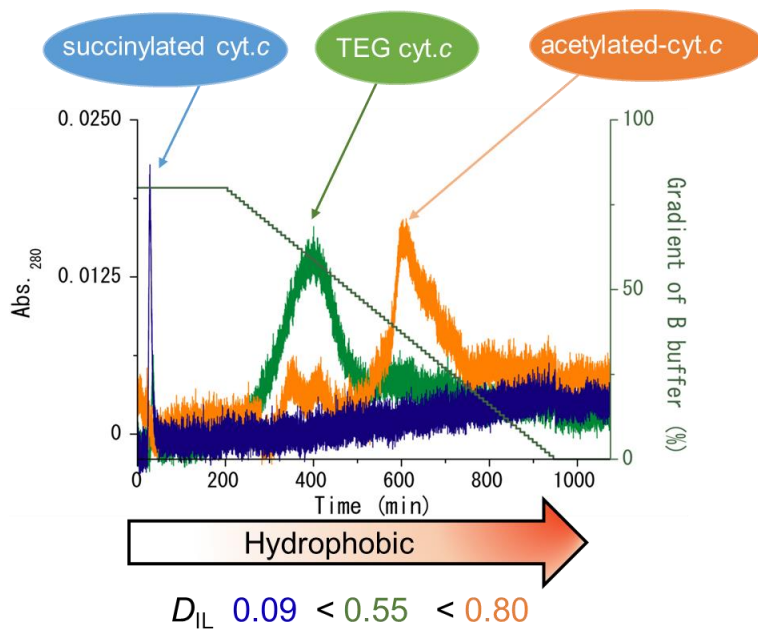

**Figure S1.** Hydrophobic interaction chromatograph based on the retention time of modified cyt c.

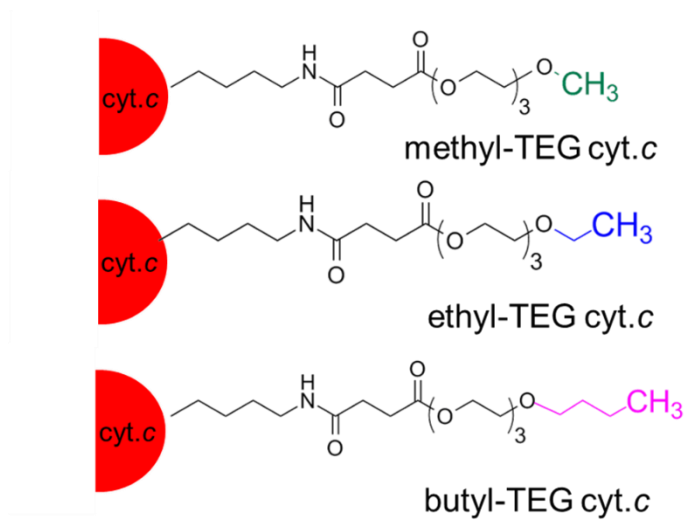

**Figure S2.** Modified cyt. c with different TEG modifier having terminal alkyl chain length.
